# Supplementary material
Source: PubMed Central journal article supplement (PMC2754755)
Supplement: NIHMS108621-supplement-1_si_001.pdf [file NIHMS108621-supplement-1_si_001.pdf]

# $^{15}\text{N}$ - $^{15}\text{N}$ Proton Assisted Recoupling

## **Supporting Information**

*Józef R. Lewandowski, Gaël De Paëpe, Matthew T. Eddy, Robert G. Griffin*

Department of Chemistry and Francis Bitter Magnet Laboratory, Massachusetts Institute  
of Technology, Cambridge, Massachusetts 02139, USA.

| Atom              | X     | Y      | Z      | $\delta_{\text{iso}}$ (ppm) | $\delta_{\text{aniso}}$ (ppm) | $\eta$ |
|-------------------|-------|--------|--------|-----------------------------|-------------------------------|--------|
| N <sub>35</sub> N | 6.433 | 0.681  | 21.962 | -5                          | -106                          | 0.2    |
| N <sub>35</sub> H | 5.718 | 1.142  | 21.364 | 5                           | -110                          | 0.2    |
| D <sub>36</sub> N | 5.419 | -1.641 | 23.313 | 0                           | 5.7                           | 0.65   |
| D <sub>36</sub> H | 4.904 | -1.32  | 22.468 | 0                           | 5.7                           | 0.65   |

**Table S11.** Atom coordinates and chemical shift values of the spin system used in the numerical simulation in the Fig. 2. The coordinates are taken from the x-ray structure of GB1 protein (PDB ID 2GI9). The <sup>1</sup>H's were added in Chimera<sup>81</sup> and NH bonds adjusted to 1.04 Å in Accelrys DS Visualizer 2.0.

| Atom              | X     | Y      | Z      | $\delta_{\text{iso}}$ (ppm) | $\delta_{\text{aniso}}$ (ppm) | $\eta$ |
|-------------------|-------|--------|--------|-----------------------------|-------------------------------|--------|
| K <sub>31</sub> N | 3.707 | 3.18   | 17.231 | -5                          | -106                          | 0.2    |
| Q <sub>32</sub> N | 2.57  | 1.986  | 19.467 | 5                           | -110                          | 0.2    |
| Y <sub>33</sub> N | 3.579 | -0.659 | 18.994 | 1                           | -106                          | 0.2    |
| A <sub>34</sub> N | 6.33  | -0.189 | 19.299 | 3                           | -110                          | 0.2    |
| K <sub>31</sub> H | 2.982 | 3.7    | 16.696 | 5                           | 5.7                           | 0.65   |
| Q <sub>32</sub> H | 1.892 | 2.273  | 18.733 | 0                           | 5.7                           | 0.65   |
| Y <sub>33</sub> H | 3.186 | -0.156 | 18.173 | 0                           | 5.7                           | 0.65   |
| A <sub>34</sub> H | 5.812 | 0.508  | 18.727 | 0                           | 5.7                           | 0.65   |

**Table S12.** Atom coordinates and chemical shift values for the  $\alpha$ -helix spin system used in simulation in Fig. 5. The coordinates are taken from the x-ray structure of protein GB1 (PDB ID 2GI9) and NH bonds adjusted to 1.04 Å in Accelrys DS Visualizer 2.0.

| Atom              | X      | Y      | Z      | $\delta_{\text{iso}}$ (ppm) | $\delta_{\text{aniso}}$ (ppm) | $\eta$ |
|-------------------|--------|--------|--------|-----------------------------|-------------------------------|--------|
| T <sub>43</sub> N | 11.226 | 9.874  | 16.505 | -5                          | -106                          | 0.2    |
| T <sub>44</sub> N | 10.639 | 9.569  | 12.975 | 5                           | -106                          | 0.2    |
| T <sub>45</sub> N | 8.75   | 10.166 | 9.967  | 2                           | -106                          | 0.2    |
| T <sub>53</sub> N | 10.547 | 5.747  | 11.227 | -3                          | -106                          | 0.2    |
| V <sub>54</sub> N | 12.114 | 4.79   | 14.309 | 1                           | -106                          | 0.2    |
| T <sub>43</sub> H | 10.945 | 10.753 | 16.916 | 0                           | 5.7                           | 0.65   |
| T <sub>44</sub> H | 10.777 | 8.569  | 12.993 | 0                           | 5.7                           | 0.65   |
| T <sub>45</sub> H | 8.907  | 11.164 | 9.947  | 0                           | 5.7                           | 0.65   |
| T <sub>53</sub> H | 10.255 | 6.709  | 11.323 | 0                           | 5.7                           | 0.65   |
| V <sub>54</sub> H | 12.455 | 3.893  | 13.995 | 0                           | 5.7                           | 0.65   |

**Table SI3.** Atom coordinates and chemical shift values for the spin system used in the simulation in Fig. 6b. The coordinates are taken from the x-ray structure of protein GB1 (PDB ID 2GI9) and NH bonds adjusted to 1.04 Å in Accelrys DS Visualizer 2.0.

| Atom               | X       | Y      | Z       | $\delta_{\text{iso}}$ (ppm) | $\delta_{\text{aniso}}$ (ppm) | $\eta$ |
|--------------------|---------|--------|---------|-----------------------------|-------------------------------|--------|
| D <sub>230</sub> N | -38.088 | 27.067 | -13.66  | -3                          | -106                          | 0.2    |
| I <sub>231</sub> N | -34.794 | 26.728 | -12.382 | -5                          | -106                          | 0.2    |
| R <sub>232</sub> N | -31.47  | 27.642 | -12.164 | 1                           | -106                          | 0.2    |
| V <sub>267</sub> N | -34.544 | 21.857 | -11.351 | 5                           | -106                          | 0.2    |
| V <sub>268</sub> N | -31.194 | 22.88  | -11.52  | 2                           | -106                          | 0.2    |
| D <sub>230</sub> H | -38.252 | 27.981 | -13.191 | 0                           | 5.7                           | 0.65   |
| I <sub>231</sub> H | -34.757 | 25.695 | -12.496 | 0                           | 5.7                           | 0.65   |
| R <sub>232</sub> H | -31.714 | 28.643 | -12.306 | 0                           | 5.7                           | 0.65   |
| V <sub>267</sub> H | -34.665 | 20.829 | -11.247 | 0                           | 5.7                           | 0.65   |
| V <sub>268</sub> H | -31.439 | 23.889 | -11.464 | 0                           | 5.7                           | 0.65   |

**Table SI4.** Atom coordinates and chemical shift values for the spin system used in simulation in Fig. 6d. The coordinates are taken from the model 0.1 from the SSNMR structure of HET-s (218-289) prion (PDB ID 2RNM) and NH bonds adjusted to 1.04 Å in Accelrys DS Visualizer 2.0.

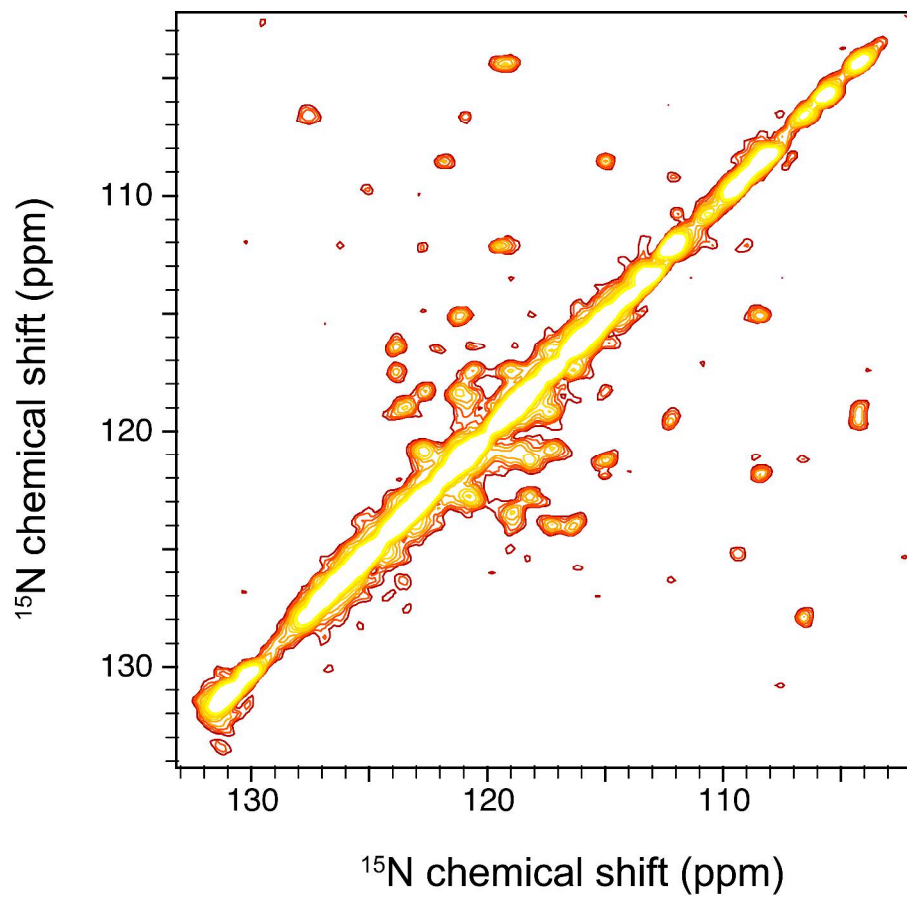

**Figure S11.** 2D  $^{15}\text{N}$ - $^{15}\text{N}$  PAR correlation spectrum on  $[1,3\text{-}^{13}\text{C},\text{U-}^{15}\text{N}]$ -protein GB1. The spectrum was obtained using 22 ms PAR mixing with  $\sim 4$  kHz  $^{15}\text{N}$  and  $\sim 52$   $^1\text{H}$  CW irradiation at  $\omega_r/2\pi=20$  kHz MAS and  $\omega_{0\text{H}}/2\pi=900$  MHz.

| Assignment | $\omega_1$ (ppm) | $\omega_2$ (ppm) | Assignment | $\omega_1$ (ppm) | $\omega_2$ (ppm) | Assignment | $\omega_1$ (ppm) | $\omega_2$ (ppm) |
|------------|------------------|------------------|------------|------------------|------------------|------------|------------------|------------------|
| M1N-Q2N    | 40.1             | 125.3            | V29N-F30N  | 119.0            | 118.3            | D46N-D47N  | 126.8            | 123.4            |
| L5N-T16N   | 126.9            | 115.2            | F30N-V29N  | 118.2            | 119.0            | D46N-T51N  | 126.4            | 112.2            |
| L7N-G14N   | 127.0            | 105.6            | F30N-K31N  | 118.7            | 120.6            | D47N-D46N  | 123.3            | 126.4            |
| N8N-G9N    | 125.2            | 109.5            | K31N-F30N  | 120.7            | 118.6            | D47N-A48N  | 123.5            | 119.0            |
| G9N-N8N    | 109.7            | 125.0            | Q32N-K31N  | 121.2            | 119.9            | A48N-D47N  | 119.0            | 123.3            |
| K10N-T11N  | 121.1            | 106.6            | Y33N-A34N  | 121.0            | 122.6            | A48N-T49N  | 118.9            | 104.1            |
| T11N-K10N  | 106.5            | 121.0            | A34N-Y33N  | 122.5            | 121.0            | T49N-A48N  | 104.4            | 119.1            |
| T11N-L12N  | 106.6            | 127.6            | A34N-N35N  | 122.5            | 118.1            | T49N-K50N  | 104.4            | 119.5            |
| L12N-T11N  | 127.8            | 106.6            | N35N-A34N  | 118.5            | 122.7            | K50N-T49N  | 119.4            | 104.3            |
| G14N-L7N   | 105.6            | 127.1            | N35N-D36N  | 118.3            | 121.2            | K50N-T51N  | 119.5            | 112.2            |
| T16N-L5N   | 115.3            | 126.8            | N35N-N37N  | 118.3            | 115.0            | T51N-D46N  | 112.3            | 126.4            |
| A23N-A24N  | 122.8            | 120.6            | D36N-A34N  | 121.3            | 122.5            | T51N-K50N  | 112.3            | 119.5            |
| A24N-A23N  | 120.6            | 122.8            | D36N-N35N  | 121.2            | 118.2            | T51N-F52N  | 112.3            | 130.1            |
| A24N-T25N  | 120.7            | 117.2            | D36N-N37N  | 121.2            | 115.0            | F52N-T51N  | 130.3            | 112.2            |
| A24N-A26N  | 120.8            | 123.8            | N37N-N35N  | 115.0            | 118.1            | T53N-T44N  | 112.2            | 109.0            |
| T25N-A24N  | 117.4            | 120.5            | N37N-D36N  | 115.1            | 121.1            | T53N-V54N  | 112.3            | 118.5            |
| T25N-A26N  | 117.4            | 123.8            | N37N-G38N  | 115.1            | 108.4            | V54N-T53N  | 118.5            | 112.1            |
| A26N-A24N  | 124.0            | 120.6            | G38N-N37N  | 108.5            | 115.0            | T55N-E42N  | 124.1            | 119.1            |
| A26N-T25N  | 124.0            | 117.2            | G38N-V39N  | 108.6            | 121.7            |            |                  |                  |
| A26N-E27N  | 123.9            | 116.4            | V39N-G38N  | 121.8            | 108.4            |            |                  |                  |
| E27N-A26N  | 116.5            | 123.9            | D40N-V39N  | 131.2            | 121.6            |            |                  |                  |
| E27N-K28N  | 116.5            | 117.2            | D40N-G41N  | 131.0            | 108.2            |            |                  |                  |
| K28N-E27N  | 117.5            | 116.3            | G41N-D40N  | 108.4            | 131.2            |            |                  |                  |
| K28N-V29N  | 117.4            | 118.8            | E42N-T55N  | 119.3            | 124.0            |            |                  |                  |
| V29N-K28N  | 119.1            | 117.3            | T44N-T53N  | 109.1            | 112.1            |            |                  |                  |

**Table SI5.** Cross-peaks observed in the spectra in Fig. 4. The sequential cross-peaks in the loop regions are highlighted in red, sequential cross-peaks in the  $\alpha$ -helix are highlighted in green, and interstrand cross-peaks within the antiparallel  $\beta$ -sheets are highlighted in blue.

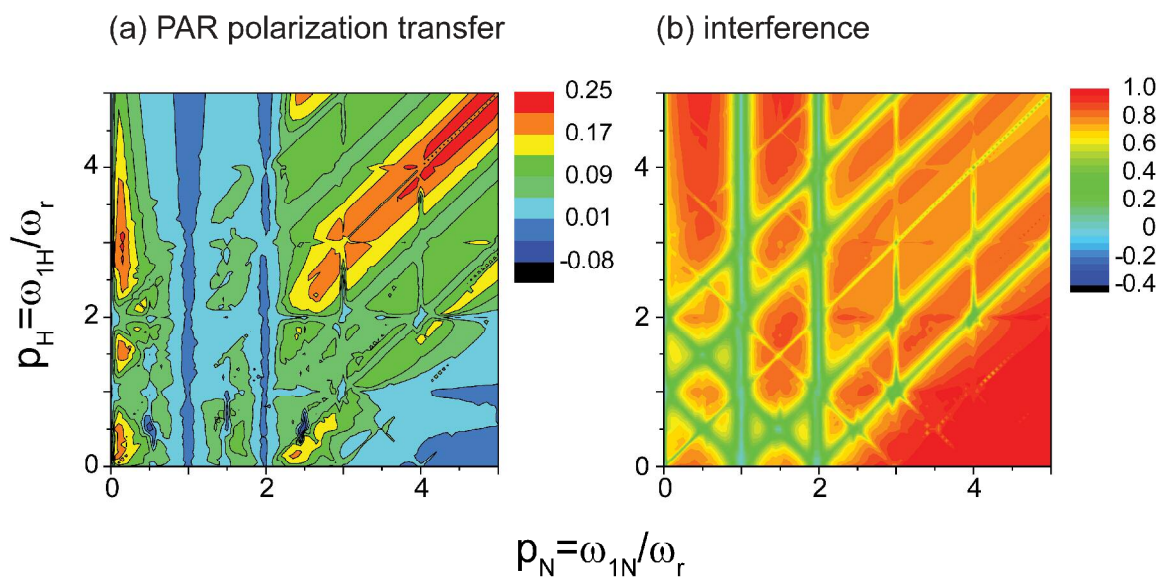

**Figure SI2.** Comparison of the  $^{15}\text{N}$ - $^{15}\text{N}$  PAR polarization transfer map (a) and the interference map (b). Simulation was performed for the spin system described in Table SI1 using 20 ms of PAR mixing at  $\omega_r/2\pi=20$  kHz MAS and  $\omega_{0H}/2\pi=750$  MHz. In the PAR optimization map the polarization transfer between the nitrogens is monitored as a function of nitrogen ( $p_N$ ) and proton ( $p_H$ ) irradiation in units of spinning frequency. In the interference map the decay of the magnetization on the nitrogens after the PAR mixing is monitored as a function of nitrogen ( $p_N$ ) and proton ( $p_H$ ) irradiation in units of spinning frequency. The initial magnetization is prepared on the x-axis on one of the nitrogens in (a) and on both nitrogens in (b).

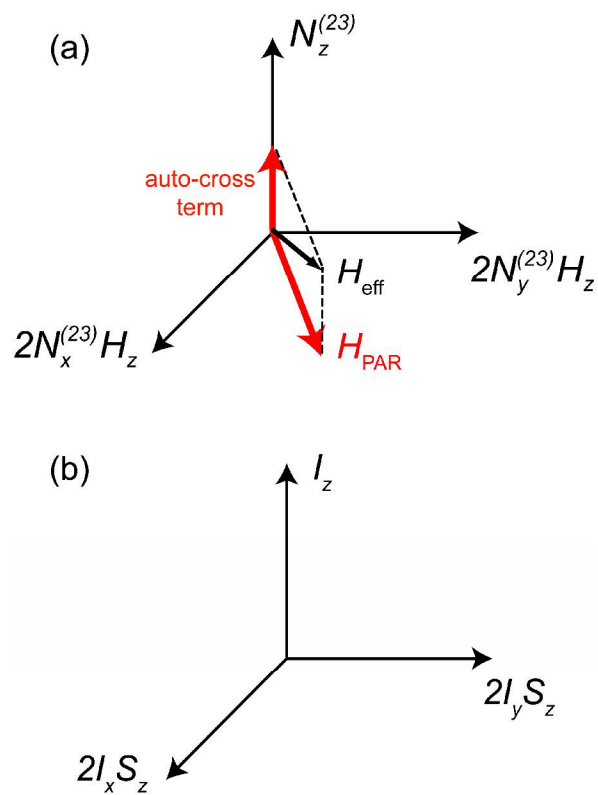

**Figure S13.** Visualization of the PAR subspace. The space can be seen as a coupled basis between a fictitious ZQ operator involving the two carbons (or nitrogens) and a proton spin. The red arrows indicate PAR recoupling axis and longitudinal tilting field resulting from auto-cross terms. Panel (b) depicts the coupled basis encountered in solution NMR.

| Atom                                                | X      | Y      | Z      | $\delta_{\text{iso}}$ (ppm) | $\delta_{\text{aniso}}$ (ppm) | $\eta$ |
|-----------------------------------------------------|--------|--------|--------|-----------------------------|-------------------------------|--------|
| T <sub>44</sub> N                                   | 10.639 | 9.569  | 12.975 | -5                          | -106                          | 0.2    |
| T <sub>53</sub> N                                   | 10.547 | 5.747  | 11.227 | 5                           | -106                          | 0.2    |
| W <sub>43</sub> H <sub><math>\alpha</math></sub>    | 10.835 | 8.369  | 15.129 | 0                           | 5.7                           | 0.65   |
| W <sub>4</sub> H <sub><math>\beta</math>3</sub>     | 8.402  | 9.135  | 14.812 | 0                           | 5.7                           | 0.65   |
| W <sub>43</sub> H <sub><math>\epsilon</math>3</sub> | 7.851  | 6.796  | 14.29  | 0                           | 5.7                           | 0.65   |
| T <sub>44</sub> H                                   | 10.781 | 8.539  | 12.994 | 0                           | 5.7                           | 0.65   |
| T <sub>44</sub> H <sub><math>\alpha</math></sub>    | 10.044 | 11.236 | 11.893 | 0                           | 5.7                           | 0.65   |
| T <sub>44</sub> H <sub><math>\gamma</math>2</sub>   | 13.117 | 10.317 | 12.407 | 0                           | 5.7                           | 0.65   |
| T <sub>53</sub> H                                   | 10.246 | 6.738  | 11.326 | 0                           | 5.7                           | 0.65   |
| T <sub>53</sub> H <sub><math>\gamma</math>1</sub>   | 14.093 | 7.513  | 11.659 | 0                           | 5.7                           | 0.65   |

**Table SI6.** Atom coordinates and chemical shift values for the spin system used in simulation in Fig. 7. The coordinates are taken from the x-ray structure of protein GB1 (PDB ID 2GI9) and NH bonds adjusted to 1.04 Å in Accelrys DS Visualizer 2.0.



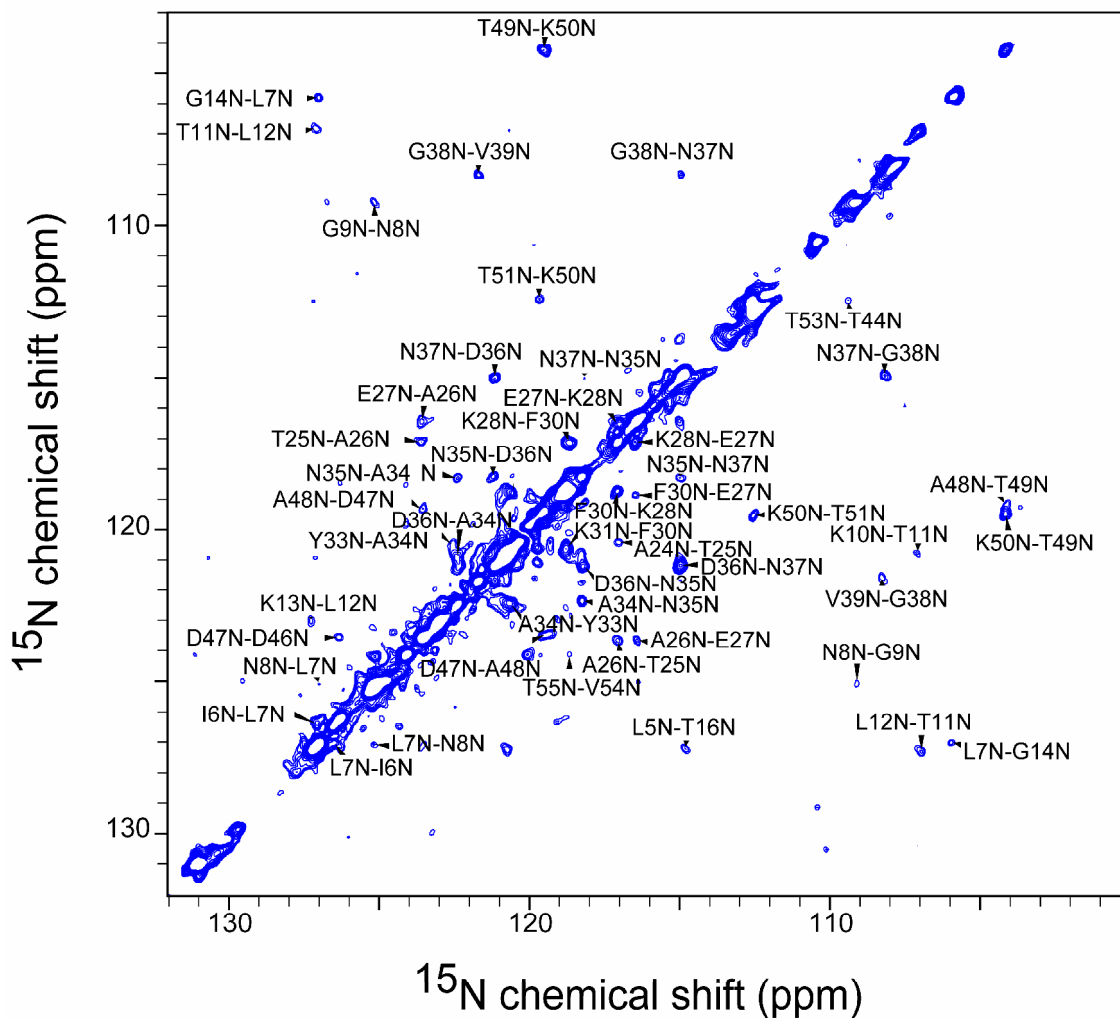

**Figure S14.** 2D  $^{15}\text{N}$ - $^{15}\text{N}$  PAR correlation spectrum on  $[\text{U-}^{13}\text{C}, ^{15}\text{N}]$ - protein GB1. The spectrum was obtained using 20 ms PAR mixing with  $\sim 71$  kHz  $^{15}\text{N}$  and  $\sim 69$   $^1\text{H}$  CW irradiation at  $\omega_r/2\pi=11.11$  kHz MAS and  $\omega_{0\text{H}}/2\pi=500$  MHz. The acquisition time was 46.1 ms in  $t_1$  and 46.1 ms in  $t_2$ . The temperature (as read by thermocouple) was maintained at  $-5^\circ\text{C}$  using 50 scfh flow of nitrogen.
