# Supplementary material
Source: PubMed Central journal article supplement (PMC2754755)
Supplement: NIHMS108621-supplement-2_si_002.pdf [file NIHMS108621-supplement-2_si_002.pdf]

---

$^{15}\text{N}$ - $^{15}\text{N}$  Proton Assisted Recoupling in Magic

Angle Spinning NMR

**Supporting Information**

*Józef R. Lewandowski,<sup>†</sup> Gaël De Paëpe, Matthew T. Eddy, Robert G. Griffin<sup>‡</sup>*

Department of Chemistry and Francis Bitter Magnet Laboratory, Massachusetts Institute  
of Technology, Cambridge, Massachusetts 02139, USA.

---

---

<sup>†</sup>Current address: Université de Lyon, CNRS/ ENS Lyon/ UCB-Lyon 1, Centre RMN à  
Très Hauts Champs, 5 rue de la Doua, 69100 Villeurbanne, France

<sup>‡</sup> Corresponding author email: [rgg@mit.edu](mailto:rgg@mit.edu)



| Atom              | X     | Y      | Z      | $\delta_{\text{iso}}$ (ppm) | $\delta_{\text{aniso}}$ (ppm) | $\eta$ |
|-------------------|-------|--------|--------|-----------------------------|-------------------------------|--------|
| N <sub>35</sub> N | 6.433 | 0.681  | 21.962 | -5                          | -106                          | 0.2    |
| N <sub>35</sub> H | 5.718 | 1.142  | 21.364 | 0                           | 5.7                           | 0.65   |
| D <sub>36</sub> N | 5.419 | -1.641 | 23.313 | 5                           | -110                          | 0.2    |
| D <sub>36</sub> H | 4.904 | -1.32  | 22.468 | 0                           | 5.7                           | 0.65   |

**Table S11.** Atom coordinates and chemical shift values of the spin system used in the numerical simulation in the Fig. 2. The coordinates are taken from the x-ray structure of GB1 protein (PDB ID 2GI9). The <sup>1</sup>H's were added in Chimera<sup>81</sup> and NH bonds adjusted to 1.04 Å in Accelrys DS Visualizer 2.0.

| Atom              | X     | Y      | Z      | $\delta_{\text{iso}}$ (ppm) | $\delta_{\text{aniso}}$ (ppm) | $\eta$ |
|-------------------|-------|--------|--------|-----------------------------|-------------------------------|--------|
| K <sub>31</sub> N | 3.707 | 3.18   | 17.231 | -5                          | -106                          | 0.2    |
| Q <sub>32</sub> N | 2.57  | 1.986  | 19.467 | 5                           | -110                          | 0.2    |
| Y <sub>33</sub> N | 3.579 | -0.659 | 18.994 | 1                           | -106                          | 0.2    |
| A <sub>34</sub> N | 6.33  | -0.189 | 19.299 | 3                           | -110                          | 0.2    |
| K <sub>31</sub> H | 2.982 | 3.7    | 16.696 | 5                           | 5.7                           | 0.65   |
| Q <sub>32</sub> H | 1.892 | 2.273  | 18.733 | 0                           | 5.7                           | 0.65   |
| Y <sub>33</sub> H | 3.186 | -0.156 | 18.173 | 0                           | 5.7                           | 0.65   |
| A <sub>34</sub> H | 5.812 | 0.508  | 18.727 | 0                           | 5.7                           | 0.65   |

**Table S12.** Atom coordinates and chemical shift values for the  $\alpha$ -helix spin system used in simulation in Fig. 5. The coordinates are taken from the x-ray structure of protein GB1 (PDB ID 2GI9) and NH bonds adjusted to 1.04 Å in Accelrys DS Visualizer 2.0.

| Atom              | X      | Y      | Z      | $\delta_{\text{iso}}$ (ppm) | $\delta_{\text{aniso}}$ (ppm) | $\eta$ |
|-------------------|--------|--------|--------|-----------------------------|-------------------------------|--------|
| T <sub>43</sub> N | 11.226 | 9.874  | 16.505 | -5                          | -106                          | 0.2    |
| T <sub>44</sub> N | 10.639 | 9.569  | 12.975 | 5                           | -106                          | 0.2    |
| T <sub>45</sub> N | 8.75   | 10.166 | 9.967  | 2                           | -106                          | 0.2    |
| T <sub>53</sub> N | 10.547 | 5.747  | 11.227 | -3                          | -106                          | 0.2    |
| V <sub>54</sub> N | 12.114 | 4.79   | 14.309 | 1                           | -106                          | 0.2    |
| T <sub>43</sub> H | 10.945 | 10.753 | 16.916 | 0                           | 5.7                           | 0.65   |
| T <sub>44</sub> H | 10.777 | 8.569  | 12.993 | 0                           | 5.7                           | 0.65   |
| T <sub>45</sub> H | 8.907  | 11.164 | 9.947  | 0                           | 5.7                           | 0.65   |
| T <sub>53</sub> H | 10.255 | 6.709  | 11.323 | 0                           | 5.7                           | 0.65   |
| V <sub>54</sub> H | 12.455 | 3.893  | 13.995 | 0                           | 5.7                           | 0.65   |

**Table SI3.** Atom coordinates and chemical shift values for the spin system used in the simulation in Fig. 6b. The coordinates are taken from the x-ray structure of protein GB1 (PDB ID 2GI9) and NH bonds adjusted to 1.04 Å in Accelrys DS Visualizer 2.0.

| Atom               | X       | Y      | Z       | $\delta_{\text{iso}}$ (ppm) | $\delta_{\text{aniso}}$ (ppm) | $\eta$ |
|--------------------|---------|--------|---------|-----------------------------|-------------------------------|--------|
| D <sub>230</sub> N | -38.088 | 27.067 | -13.66  | -3                          | -106                          | 0.2    |
| I <sub>231</sub> N | -34.794 | 26.728 | -12.382 | -5                          | -106                          | 0.2    |
| R <sub>232</sub> N | -31.47  | 27.642 | -12.164 | 1                           | -106                          | 0.2    |
| V <sub>267</sub> N | -34.544 | 21.857 | -11.351 | 5                           | -106                          | 0.2    |
| V <sub>268</sub> N | -31.194 | 22.88  | -11.52  | 2                           | -106                          | 0.2    |
| D <sub>230</sub> H | -38.252 | 27.981 | -13.191 | 0                           | 5.7                           | 0.65   |
| I <sub>231</sub> H | -34.757 | 25.695 | -12.496 | 0                           | 5.7                           | 0.65   |
| R <sub>232</sub> H | -31.714 | 28.643 | -12.306 | 0                           | 5.7                           | 0.65   |
| V <sub>267</sub> H | -34.665 | 20.829 | -11.247 | 0                           | 5.7                           | 0.65   |
| V <sub>268</sub> H | -31.439 | 23.889 | -11.464 | 0                           | 5.7                           | 0.65   |

**Table SI4.** Atom coordinates and chemical shift values for the spin system used in simulation in Fig. 6d. The coordinates are taken from the model 0.1 from the SSNMR structure of HET-s (218-289) prion (PDB ID 2RNM) and NH bonds adjusted to 1.04 Å in Accelrys DS Visualizer 2.0.

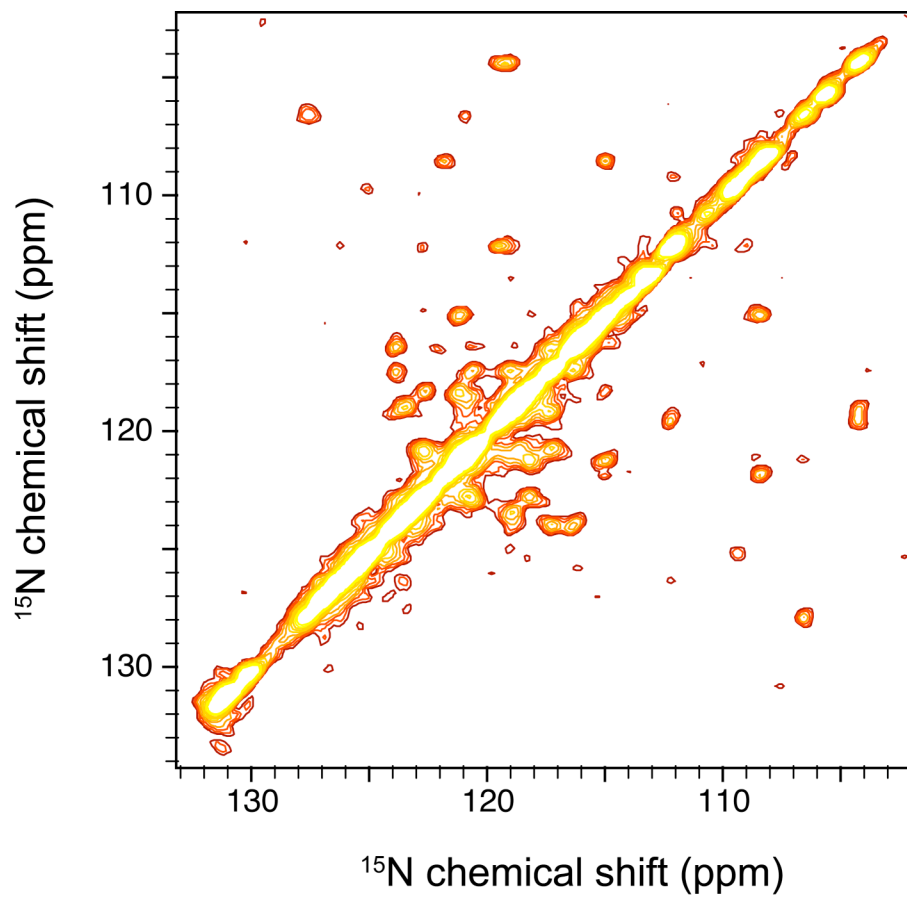

**Figure S11.** 2D  $^{15}\text{N}$ - $^{15}\text{N}$  PAR correlation spectrum on  $[1,3\text{-}^{13}\text{C},\text{U-}^{15}\text{N}]$ -protein GB1. The spectrum was obtained using 22 ms PAR mixing with  $\sim 4$  kHz  $^{15}\text{N}$  and  $\sim 52$   $^1\text{H}$  CW irradiation at  $\omega_r/2\pi = 20$  kHz MAS and  $\omega_{\text{OH}}/2\pi = 900$  MHz.

| Assignment | $\omega_1$ (ppm) | $\omega_2$ (ppm) | Assignment | $\omega_1$ (ppm) | $\omega_2$ (ppm) | Assignment | $\omega_1$ (ppm) | $\omega_2$ (ppm) |
|------------|------------------|------------------|------------|------------------|------------------|------------|------------------|------------------|
| M1N-Q2N    | 40.1             | 125.3            | V29N-F30N  | 119.0            | 118.3            | D46N-D47N  | 126.8            | 123.4            |
| L5N-T16N   | 126.9            | 115.2            | F30N-V29N  | 118.2            | 119.0            | D46N-T51N  | 126.4            | 112.2            |
| L7N-G14N   | 127.0            | 105.6            | F30N-K31N  | 118.7            | 120.6            | D47N-D46N  | 123.3            | 126.4            |
| N8N-G9N    | 125.2            | 109.5            | K31N-F30N  | 120.7            | 118.6            | D47N-A48N  | 123.5            | 119.0            |
| G9N-N8N    | 109.7            | 125.0            | Q32N-K31N  | 121.2            | 119.9            | A48N-D47N  | 119.0            | 123.3            |
| K10N-T11N  | 121.1            | 106.6            | Y33N-A34N  | 121.0            | 122.6            | A48N-T49N  | 118.9            | 104.1            |
| T11N-K10N  | 106.5            | 121.0            | A34N-Y33N  | 122.5            | 121.0            | T49N-A48N  | 104.4            | 119.1            |
| T11N-L12N  | 106.6            | 127.6            | A34N-N35N  | 122.5            | 118.1            | T49N-K50N  | 104.4            | 119.5            |
| L12N-T11N  | 127.8            | 106.6            | N35N-A34N  | 118.5            | 122.7            | K50N-T49N  | 119.4            | 104.3            |
| G14N-L7N   | 105.6            | 127.1            | N35N-D36N  | 118.3            | 121.2            | K50N-T51N  | 119.5            | 112.2            |
| T16N-L5N   | 115.3            | 126.8            | N35N-N37N  | 118.3            | 115.0            | T51N-D46N  | 112.3            | 126.4            |
| A23N-A24N  | 122.8            | 120.6            | D36N-A34N  | 121.3            | 122.5            | T51N-K50N  | 112.3            | 119.5            |
| A24N-A23N  | 120.6            | 122.8            | D36N-N35N  | 121.2            | 118.2            | T51N-F52N  | 112.3            | 130.1            |
| A24N-T25N  | 120.7            | 117.2            | D36N-N37N  | 121.2            | 115.0            | F52N-T51N  | 130.3            | 112.2            |
| A24N-A26N  | 120.8            | 123.8            | N37N-N35N  | 115.0            | 118.1            | T53N-T44N  | 112.2            | 109.0            |
| T25N-A24N  | 117.4            | 120.5            | N37N-D36N  | 115.1            | 121.1            | T53N-V54N  | 112.3            | 118.5            |
| T25N-A26N  | 117.4            | 123.8            | N37N-G38N  | 115.1            | 108.4            | V54N-T53N  | 118.5            | 112.1            |
| A26N-A24N  | 124.0            | 120.6            | G38N-N37N  | 108.5            | 115.0            | T55N-E42N  | 124.1            | 119.1            |
| A26N-T25N  | 124.0            | 117.2            | G38N-V39N  | 108.6            | 121.7            |            |                  |                  |
| A26N-E27N  | 123.9            | 116.4            | V39N-G38N  | 121.8            | 108.4            |            |                  |                  |
| E27N-A26N  | 116.5            | 123.9            | D40N-V39N  | 131.2            | 121.6            |            |                  |                  |
| E27N-K28N  | 116.5            | 117.2            | D40N-G41N  | 131.0            | 108.2            |            |                  |                  |
| K28N-E27N  | 117.5            | 116.3            | G41N-D40N  | 108.4            | 131.2            |            |                  |                  |
| K28N-V29N  | 117.4            | 118.8            | E42N-T55N  | 119.3            | 124.0            |            |                  |                  |
| V29N-K28N  | 119.1            | 117.3            | T44N-T53N  | 109.1            | 112.1            |            |                  |                  |

**Table SI5.** Cross-peaks observed in the spectra in Fig. 4. The sequential cross-peaks in the loop regions are highlighted in red, sequential cross-peaks in the  $\alpha$ -helix are highlighted in green, and interstrand cross-peaks within the antiparallel  $\beta$ -sheets are highlighted in blue.

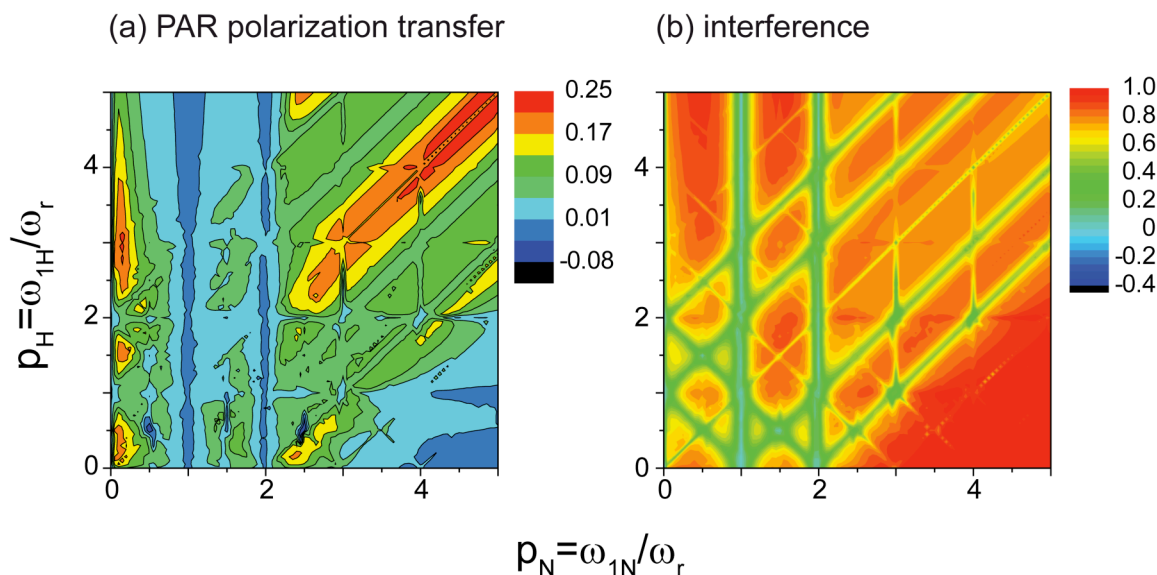

**Figure SI2.** Comparison of the  $^{15}\text{N}$ - $^{15}\text{N}$  PAR polarization transfer map (a) and the interference map (b). Simulation was performed for the spin system described in Table SI1 using 20 ms of PAR mixing at  $\omega_r/2\pi=20$  kHz MAS and  $\omega_{0H}/2\pi=750$  MHz. In the PAR optimization map the polarization transfer between the nitrogens is monitored as a function of nitrogen ( $p_N$ ) and proton ( $p_H$ ) irradiation in units of spinning frequency. In the interference map the decay of the magnetization on the nitrogens after the PAR mixing is monitored as a function of nitrogen ( $p_N$ ) and proton ( $p_H$ ) irradiation in units of spinning frequency. The initial magnetization is prepared on the x-axis on one of the nitrogens in (a) and on both nitrogens in (b). Usually, one can find the optimal PAR settings by running a small number of 1D interference experiments. First, one needs to identify the rotary resonance conditions by employing high power  $^1\text{H}$  decoupling and scanning through the  $^{15}\text{N}$  rf settings. Then, one can fix the nitrogen power at a desired level and scan through the  $^1\text{H}$  rf settings in order to identify Hartmann-Hahn conditions. We experimentally observe the interference (rotary resonance and Hartmann-Hahn) conditions present in the simulations (both the interference and the polarization transfer maps), which allows us to appropriately orient the rf settings for a PAR mixing period.

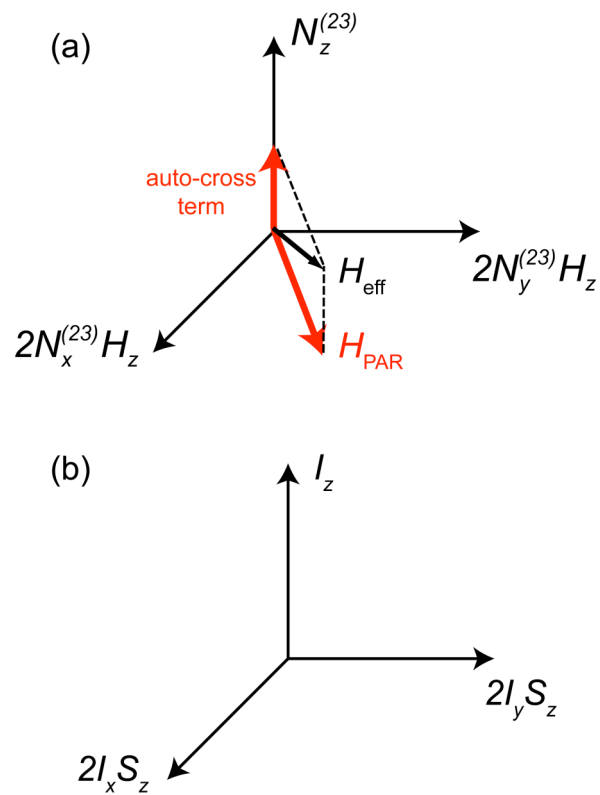

**Figure S13.** Visualization of the PAR subspace. The space can be seen as a coupled basis between a fictitious ZQ operator involving the two carbons (or nitrogens) and a proton spin. The red arrows indicate PAR recoupling axis and longitudinal tilting field resulting from auto-cross terms. Panel (b) depicts the coupled basis encountered in solution NMR.



| Atom                                                | X      | Y      | Z      | $\delta_{\text{iso}}$ (ppm) | $\delta_{\text{aniso}}$ (ppm) | $\eta$ |
|-----------------------------------------------------|--------|--------|--------|-----------------------------|-------------------------------|--------|
| T <sub>44</sub> N                                   | 10.639 | 9.569  | 12.975 | -5                          | -106                          | 0.2    |
| T <sub>53</sub> N                                   | 10.547 | 5.747  | 11.227 | 5                           | -106                          | 0.2    |
| W <sub>43</sub> H <sub><math>\alpha</math></sub>    | 10.835 | 8.369  | 15.129 | 0                           | 5.7                           | 0.65   |
| W <sub>4</sub> H <sub><math>\beta</math>3</sub>     | 8.402  | 9.135  | 14.812 | 0                           | 5.7                           | 0.65   |
| W <sub>43</sub> H <sub><math>\epsilon</math>3</sub> | 7.851  | 6.796  | 14.29  | 0                           | 5.7                           | 0.65   |
| T <sub>44</sub> H                                   | 10.781 | 8.539  | 12.994 | 0                           | 5.7                           | 0.65   |
| T <sub>44</sub> H <sub><math>\alpha</math></sub>    | 10.044 | 11.236 | 11.893 | 0                           | 5.7                           | 0.65   |
| T <sub>44</sub> H <sub><math>\gamma</math>2</sub>   | 13.117 | 10.317 | 12.407 | 0                           | 5.7                           | 0.65   |
| T <sub>53</sub> H                                   | 10.246 | 6.738  | 11.326 | 0                           | 5.7                           | 0.65   |
| T <sub>53</sub> H <sub><math>\gamma</math>1</sub>   | 14.093 | 7.513  | 11.659 | 0                           | 5.7                           | 0.65   |

**Table SI6.** Atom coordinates and chemical shift values for the spin system used in simulation in Fig. 7. The coordinates are taken from the x-ray structure of protein GB1 (PDB ID 2GI9) and NH bonds adjusted to 1.04 Å in Accelrys DS Visualizer 2.0.

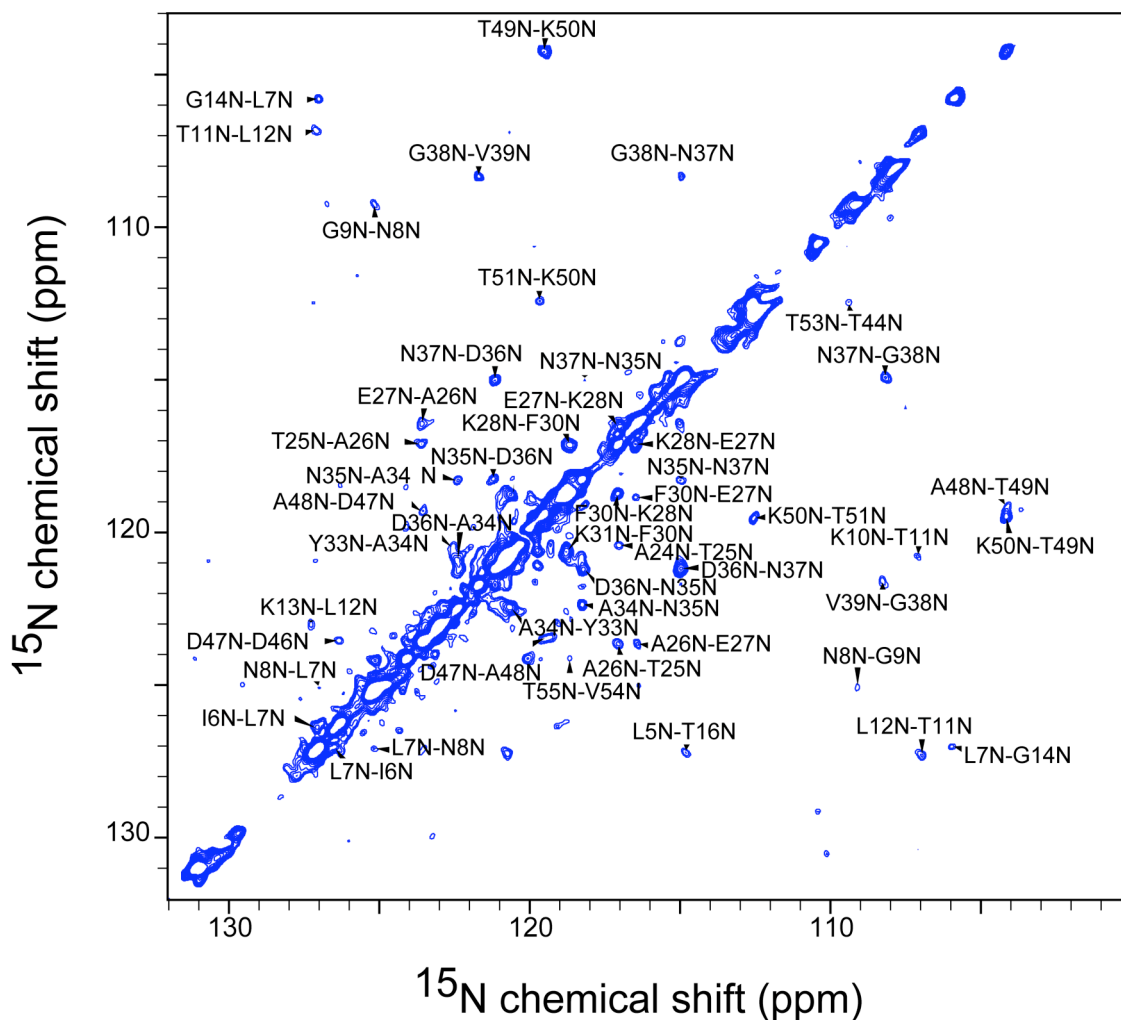

**Figure SI4.** 2D  $^{15}\text{N}$ - $^{15}\text{N}$  PAR correlation spectrum on  $[\text{U-}^{13}\text{C}, ^{15}\text{N}]$ - protein GB1. The spectrum was obtained using 20 ms PAR mixing with  $\sim 71$  kHz  $^{15}\text{N}$  and  $\sim 69$   $^1\text{H}$  CW irradiation at  $\omega_1/2\pi=11.11$  kHz MAS and  $\omega_{\text{OH}}/2\pi=500$  MHz. The acquisition time was 46.1 ms in  $t_1$  and 46.1 ms in  $t_2$ . The temperature (as read by thermocouple) was maintained at  $-5^\circ\text{C}$  using 50 scfh flow of nitrogen.

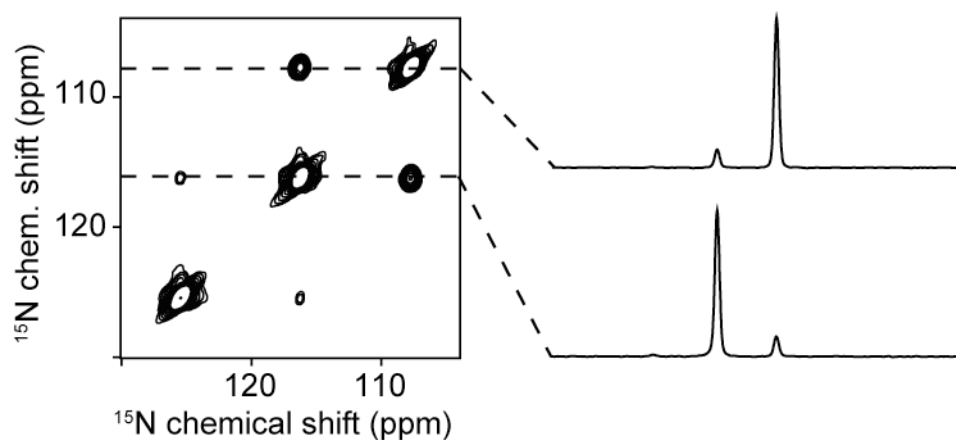

**Figure SI5.** Slices from the low power 2D  $^{15}\text{N}$ - $^{15}\text{N}$  PAR correlation spectrum obtained on  $[\text{U-}^{13}\text{C}, ^{15}\text{N}]\text{-}f\text{-MLF-OH}^{71}$  at  $\omega_r/2\pi = 20$  kHz and  $\omega_{\text{OH}}/2\pi = 900$  MHz using 20 ms of mixing time.

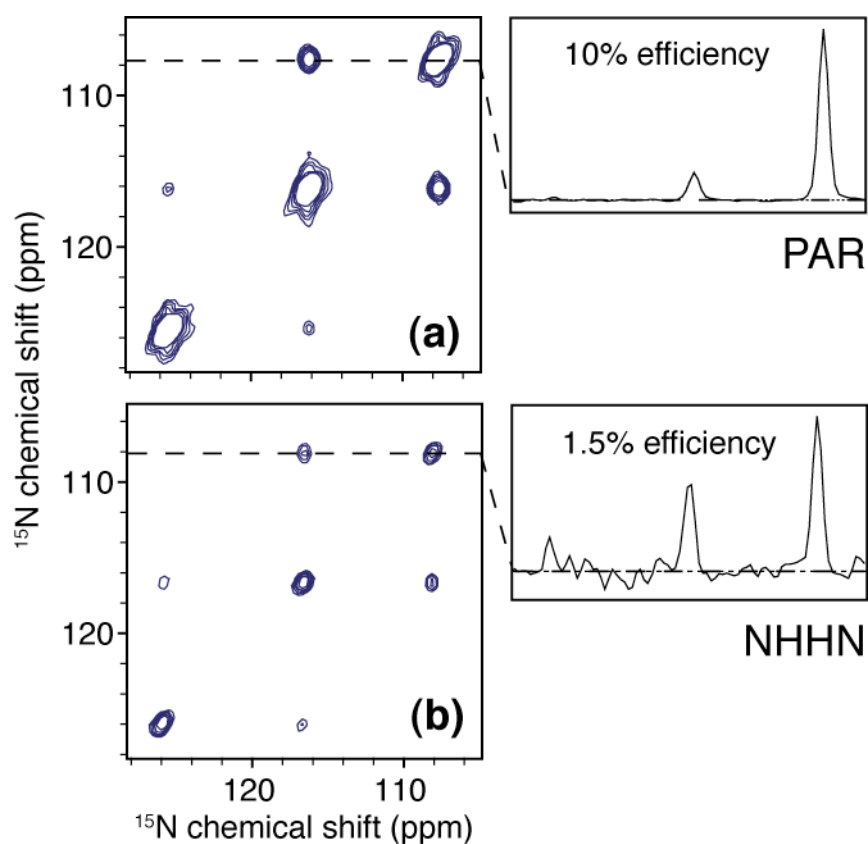

**Figure SI6.** Comparison of  $^{15}\text{N}$ - $^{15}\text{N}$  PAR and NHHN on  $[\text{U-}^{13}\text{C}, ^{15}\text{N}]\text{-}f\text{-MLF-OH}$ . (a) 2D  $^{15}\text{N}$ - $^{15}\text{N}$  PAR correlation spectrum with 25 ms mixing time. (b) 2D NHHN correlation spectrum with 0.8 ms mixing time. The panels on the right of the spectra show 1D slices at FN frequency. **Note that the slices can be used to judge the relative SNR of the spectra but cannot be used for judging of the polarization transfer efficiency.** Even

though the cross-peak in the NHHN spectrum consists ~60% of the diagonal peak it correlates to only 1.5 % polarization transfer efficiency (compared to a reference experiment with zero mixing time). On the other hand, the cross-peak in the PAR spectrum corresponds to 10 % transfer efficiency even though it consists much smaller fraction of the diagonal peak. Both of the spectra were obtained at  $\omega_r/2\pi = 20$  kHz and  $\omega_{0H}/2\pi = 750$  MHz using the same settings except for the mixing scheme. The spectra were chosen based on the best achievable LN-FN polarization transfer efficiency for the 0.6-1.2 ms mixing time range for NHHN and 5-25 ms mixing time range for PAR.
