# Supplementary material
Source: PubMed Central journal article supplement (PMC2754755)

Table of Contents Graphic

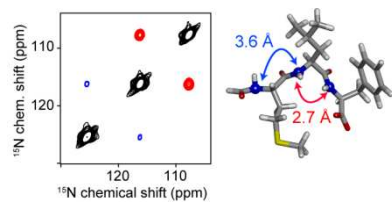

Supplement: NIHMS108621-supplement-3_si_003.pdf [file NIHMS108621-supplement-3_si_003.pdf]
